# Supplementary material for: Reliability and validity of the Brief 2-Way Social Support Scale: an investigation of social support in promoting older adult well-being
Source: PubMed Central journal article supplement — SAGE Open Med. 2019 Mar 12;7:2050312119836020. doi: 10.1177/2050312119836020 (PMC6415481; doi:10.1177/2050312119836020), 2019-03-12
Supplement: Appendix.pdf [file Appendix.pdf]

## Appendix

Table 1.

*Standardised Factor Loadings From the CFA Analyses of the Four Factor Models of the 20-item Original 2-Way SSS the and Brief 2-Way SSS*

| <b>Item number</b> | <b>SSS Factor</b> | <b>Item</b>                                                                            | <b>20-item scale</b> | <b>12-item scale</b> |
|--------------------|-------------------|----------------------------------------------------------------------------------------|----------------------|----------------------|
| 1                  | RE                | There is someone I can talk to about the pressures in my life                          | 0.705                |                      |
| 2                  | RE                | There is at least one person that I can share most things with                         | 0.792                | 0.79                 |
| 3                  | RE                | When I am feeling down there is someone I can lean on                                  | 0.858                | 0.895                |
| 4                  | RE                | There is someone in my life I can get emotional support from                           | 0.802                | 0.792                |
| 5                  | RE                | There is at least one person that I feel I can trust                                   | 0.643                |                      |
| 6                  | RE                | There is someone in my life that makes me feel worthwhile                              | 0.662                |                      |
| 7                  | RE                | I feel that I have a circle of people who value me                                     | 0.466                |                      |
| 8                  | GE                | I am there to listen to other's problems                                               | 0.662                |                      |
| 9                  | GE                | I look for ways to cheer people up when they are feeling down                          | 0.700                |                      |
| 10                 | GE                | People close to me tell me their fears and worries                                     | 0.791                | 0.812                |
| 11                 | GE                | I give others a sense of comfort in times of need                                      | 0.767                | 0.735                |
| 12                 | GE                | People confide in me when they have problems                                           | 0.747                | 0.772                |
| 13                 | RI                | If stranded somewhere there is someone who would get me                                | 0.636                | 0.628                |
| 14                 | RI                | I have someone to help me if I am physically unwell                                    | 0.866                | 0.904                |
| 15                 | RI                | There is someone who would give me financial assistance                                | 0.538                |                      |
| 16                 | RI                | There is someone who can help me fulfil my responsibilities when I am unable           | 0.824                | 0.800                |
| 17                 | GI                | I help others when they are too busy to get everything done                            | 0.711                | 0.721                |
| 18                 | GI                | I have helped someone with their responsibilities when they were unable to fulfil them | 0.658                | 0.645                |
| 19                 | GI                | When someone I lived with was sick I helped them                                       | 0.482                |                      |
| 20                 | GI                | I am a person others turn to for help with tasks                                       | 0.770                | 0.817                |
